# Supplementary material for: Supramolecular assembly of a biomineralizing antimicrobial peptide in coarse-grained Monte Carlo simulations
Source: Royal Society of Chemistry journal article supplement (doi:10.1039/c0cp01364a), 2010-11-12
Supplement: c0cp01364a.pdf [file c0cp01364a.pdf]

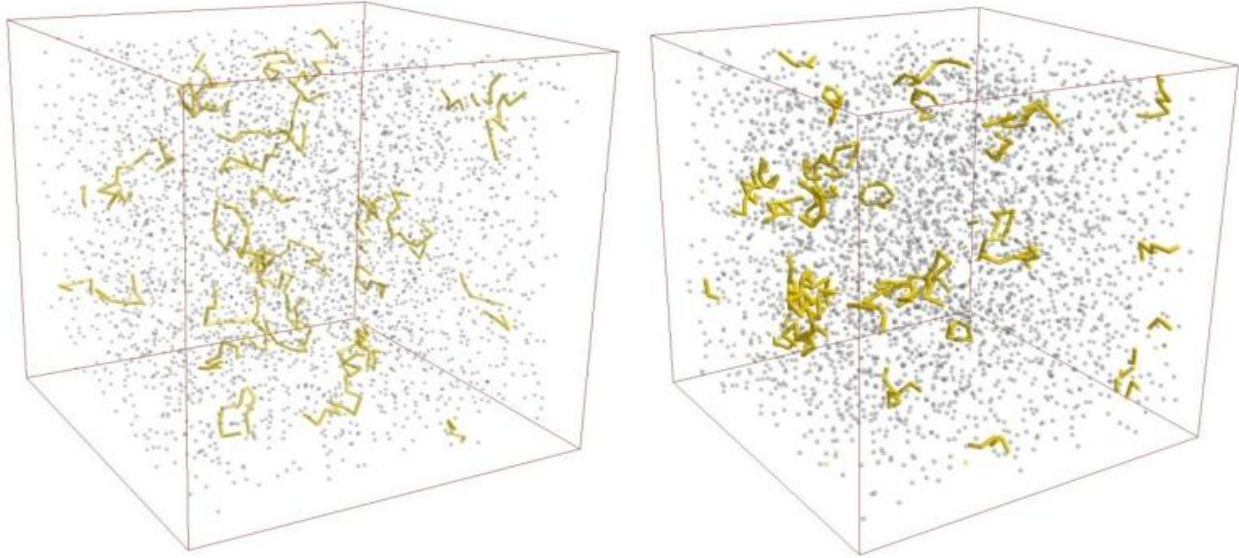

$$C_K = 0.01, C_{Ph} = 0.1, \varepsilon_{KPh} = -0.5$$

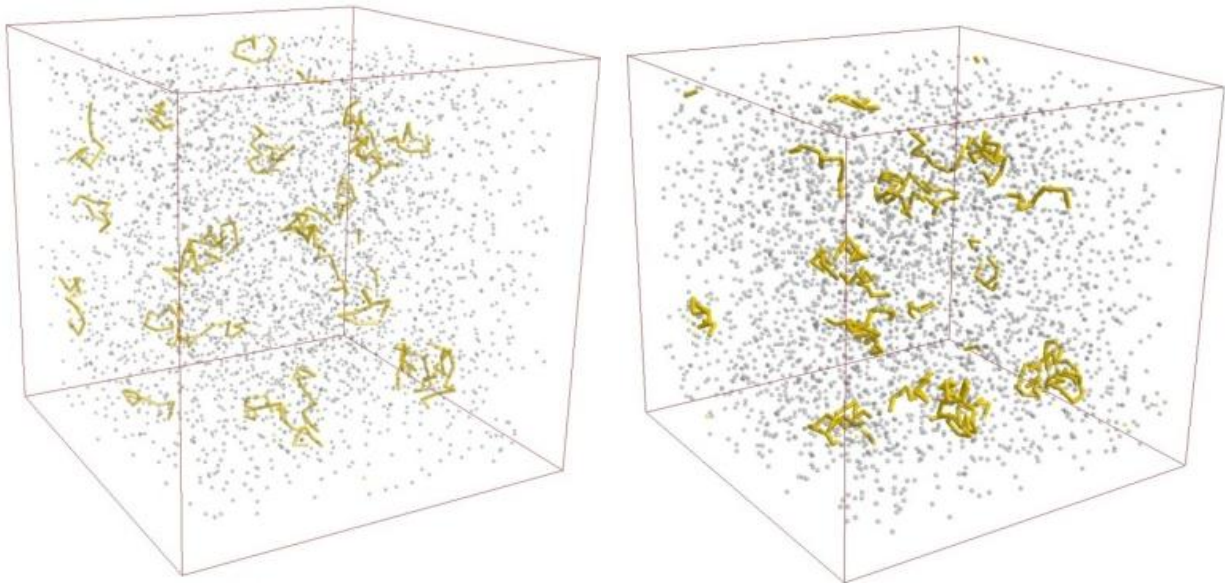

$$C_K = 0.01, C_{Ph} = 0.1, \varepsilon_{KPh} = -0.6$$

**Figure S1.** Endpoint snapshots of simulations of a  $64^3$  lattice size and either  $t = 10^5$  MCS (left) or  $t = 10^6$  MCS (right). The lysine ( $C_K$ ) and phosphate ( $C_{Ph}$ ) concentrations and the lysine-phosphate interaction strength ( $\varepsilon_{KPh}$ ) for each row of simulation snapshots is shown below. Visually, peptides in snapshots at  $t = 10^6$  are more aggregated than at  $t = 10^5$ , demonstrating that a total of  $10^5$  time steps is insufficient for system to reach an equilibrium.

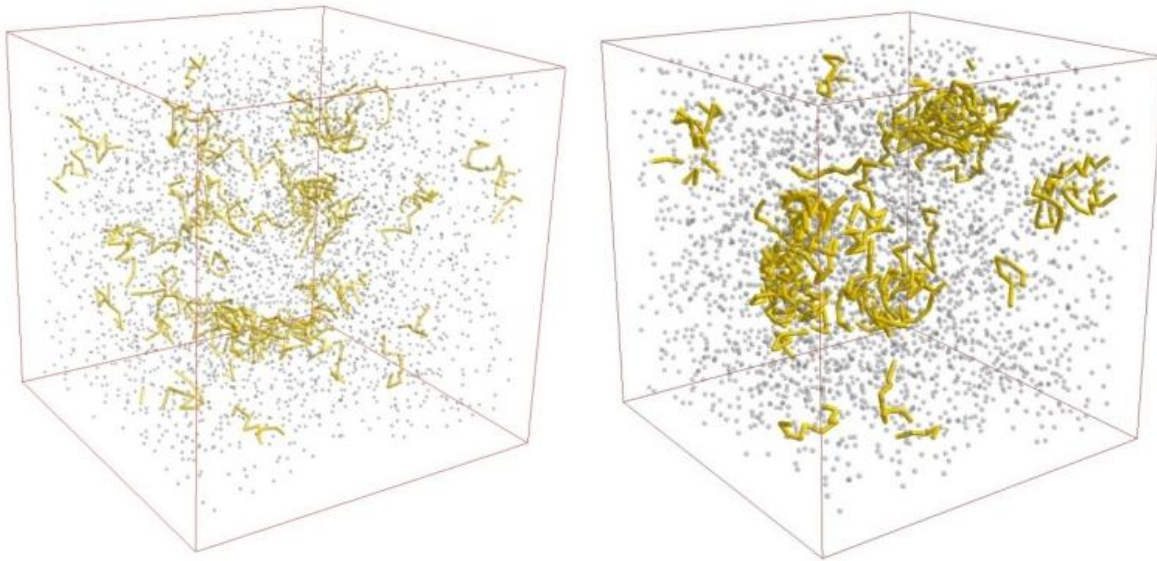

$$C_K = 0.02, C_{Ph} = 0.1, \epsilon_{KPh} = -0.5$$

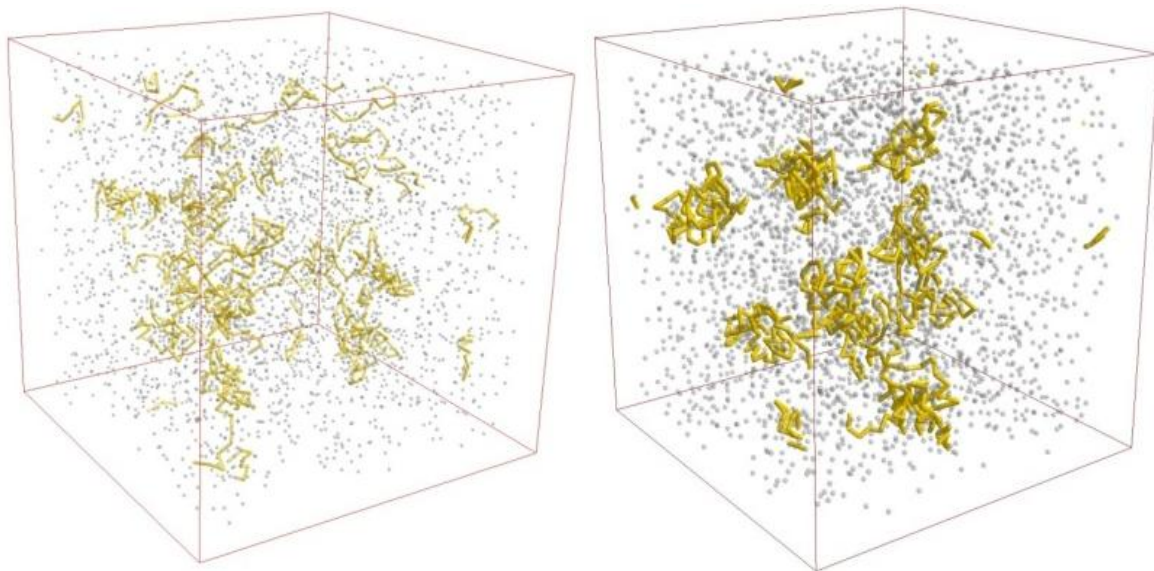

$$C_K = 0.02, C_{Ph} = 0.1, \epsilon_{KPh} = -0.6$$

**Figure S1 continued.** Endpoint snapshots of simulations of a  $64^3$  lattice size and either  $t = 10^5$  MCS (left) or  $t = 10^6$  MCS (right). The lysine ( $C_K$ ) and phosphate ( $C_{Ph}$ ) concentrations and the lysine-phosphate interaction strength ( $\epsilon_{KPh}$ ) for each row is shown on the left. Visually, peptides in snapshots at  $t = 10^6$  are more aggregated than at  $t = 10^5$ , demonstrating that a total of  $10^5$  time steps is insufficient for system to reach an equilibrium.

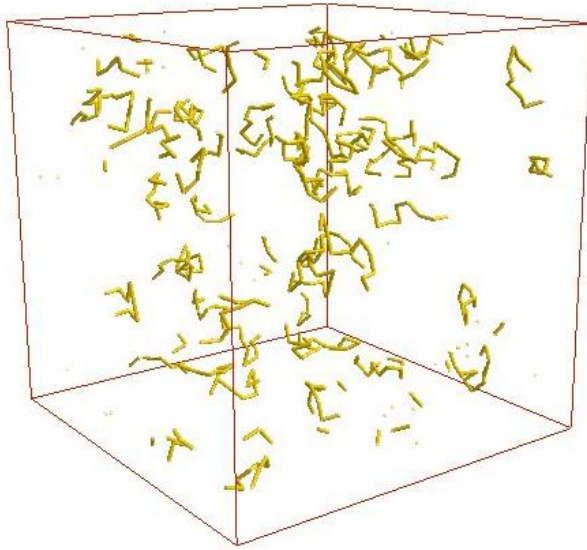

$C_K = 0.2, \epsilon_{KPh} = -0.5$

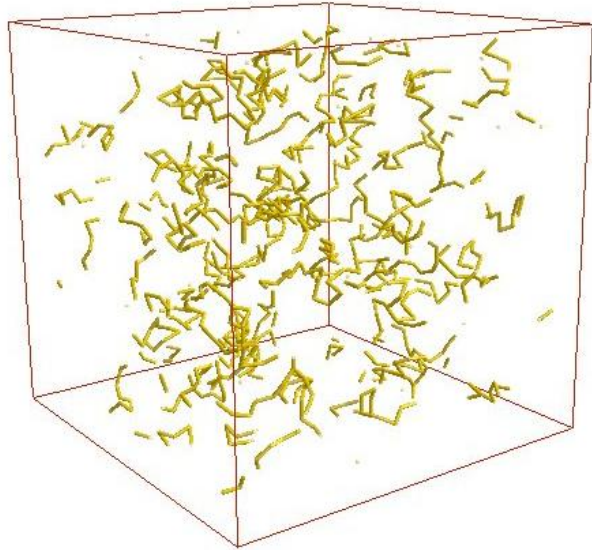

$C_K = 0.3, \epsilon_{KPh} = -0.6$

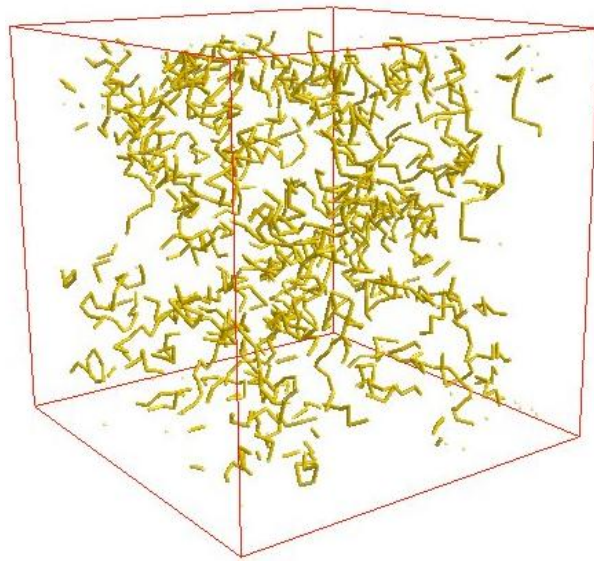

$C_K = 0.5, \epsilon_{KPh} = -0.7$

**Figure S2.** Snapshots of simulations of a  $64^3$  lattice size and at the end of time step  $t = 10^6$  MCS. Simulations do not contain phosphate. The lysine ( $C_K$ ) concentrations and lysine-phosphate interaction strength ( $\epsilon_{KPh}$ ) are shown below each snapshot.

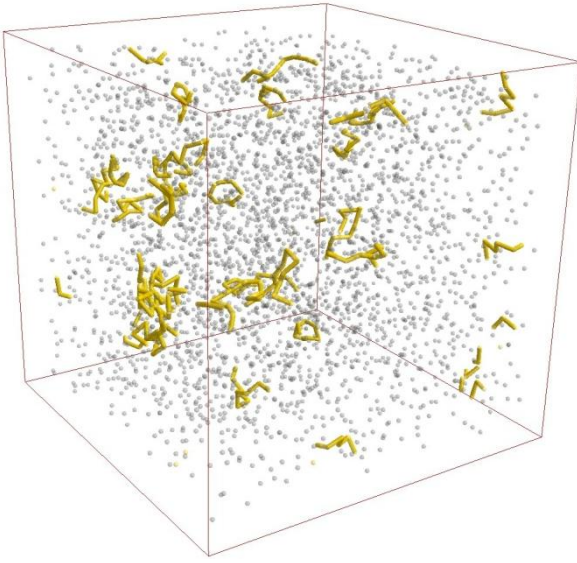

$$\epsilon_{KPh} = -0.5$$

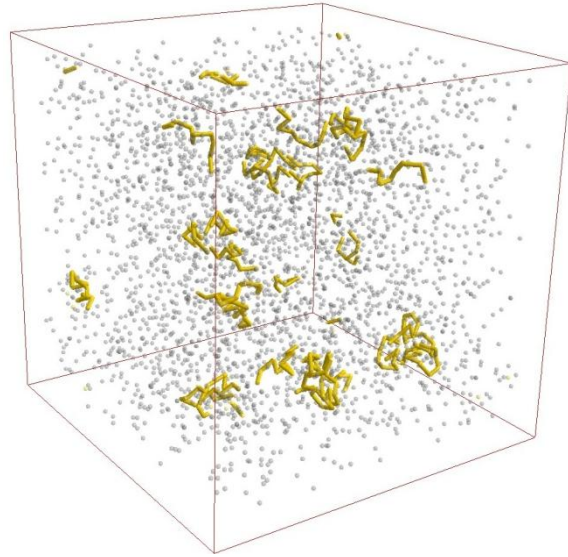

$$\epsilon_{KPh} = -0.6$$

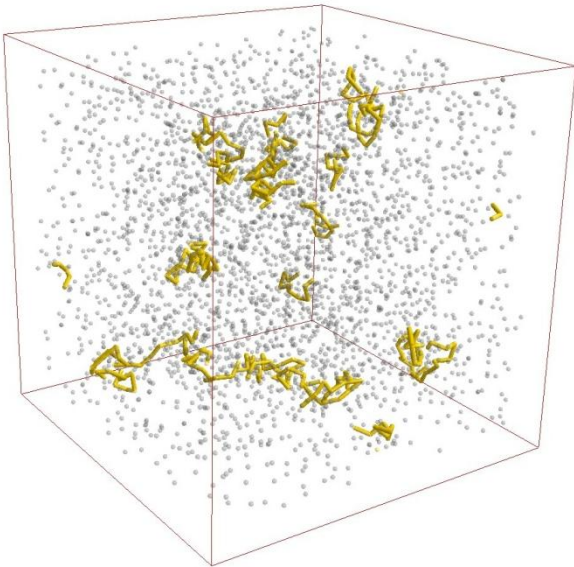

$$\epsilon_{KPh} = -0.7$$

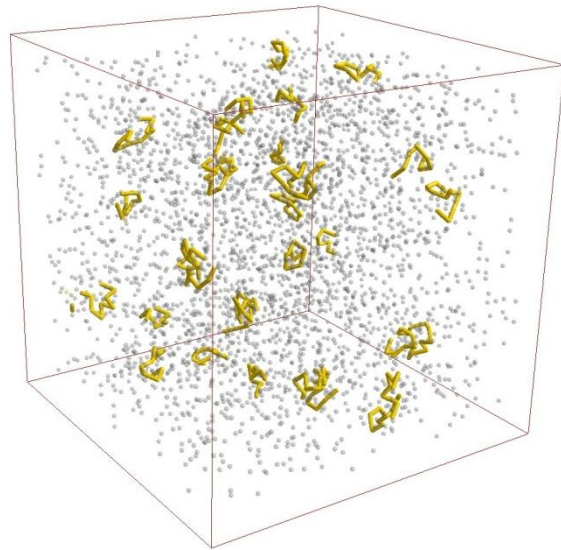

$$\epsilon_{KPh} = -0.8$$

**Figure S2 continued.** Snapshots of simulations of a  $64^3$  lattice size and at the end of time step  $t = 10^6$  MCS. The lysine ( $C_K$ ) and phosphate ( $C_{Ph}$ ) concentrations were 0.01 and 0.1, respectively. The lysine-phosphate interaction strength ( $\epsilon_{KPh}$ ) is shown below each snapshot.

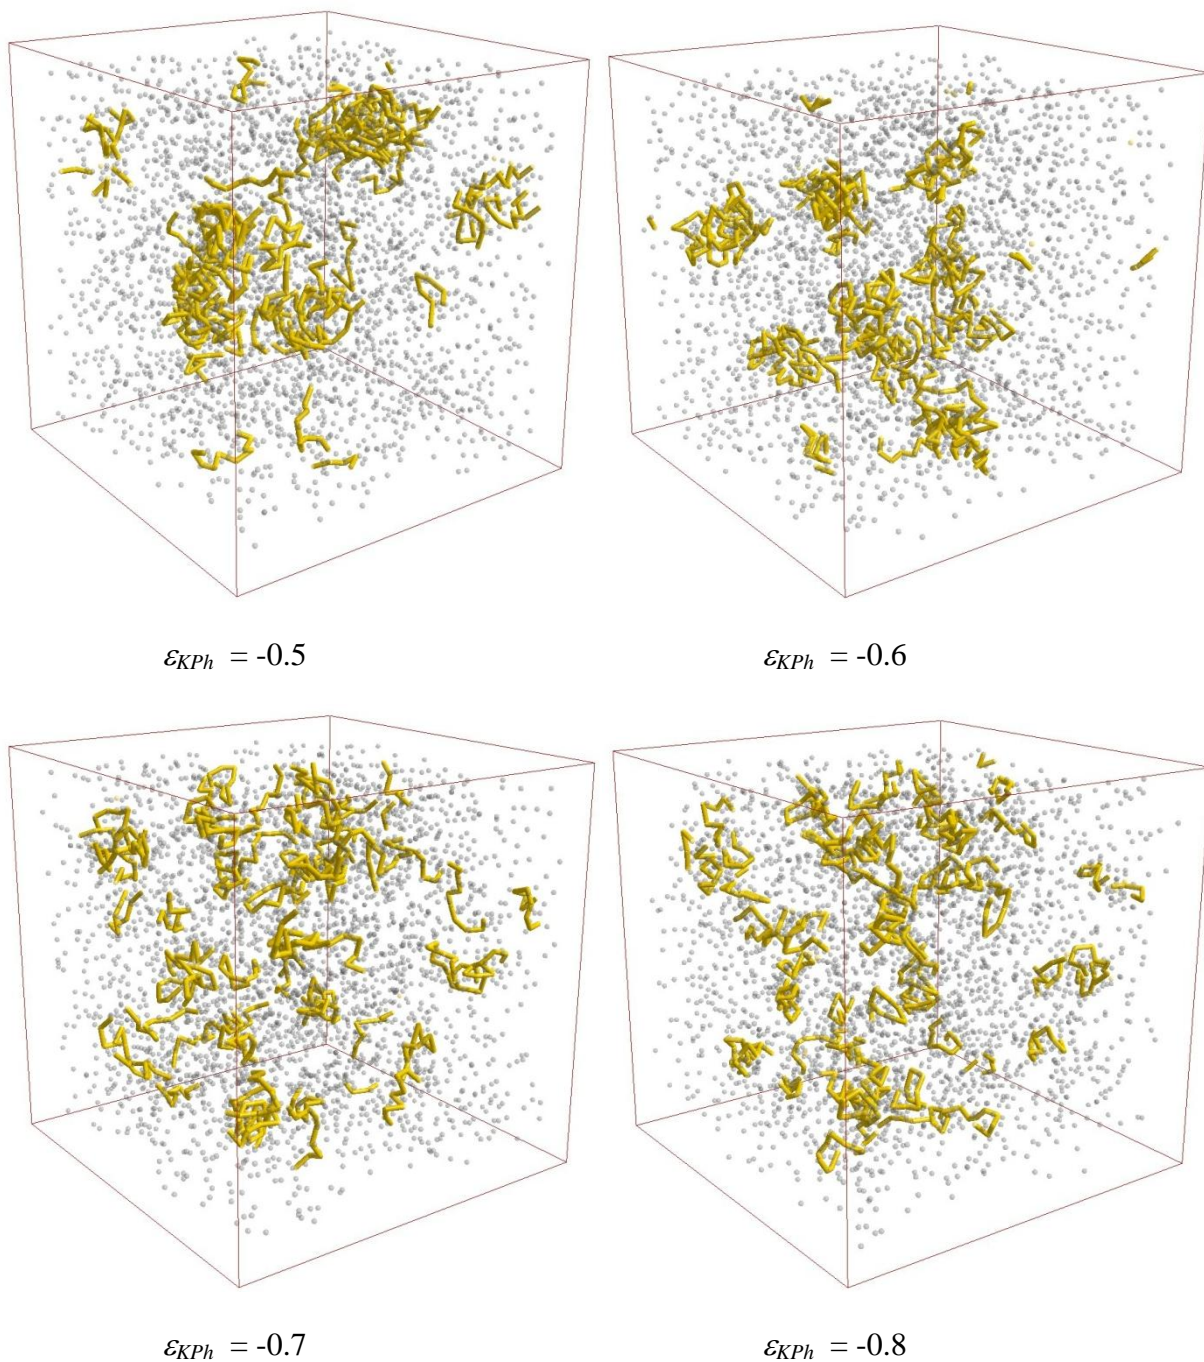

**Figure S2 continued.** Snapshots of simulations of a  $64^3$  lattice size and at the end of time step  $t = 10^6$  MCS. The lysine ( $C_K$ ) and phosphate ( $C_{Ph}$ ) concentrations were 0.02 and 0.1, respectively. The lysine-phosphate interaction strength ( $\epsilon_{KPh}$ ) is shown below each snapshot.

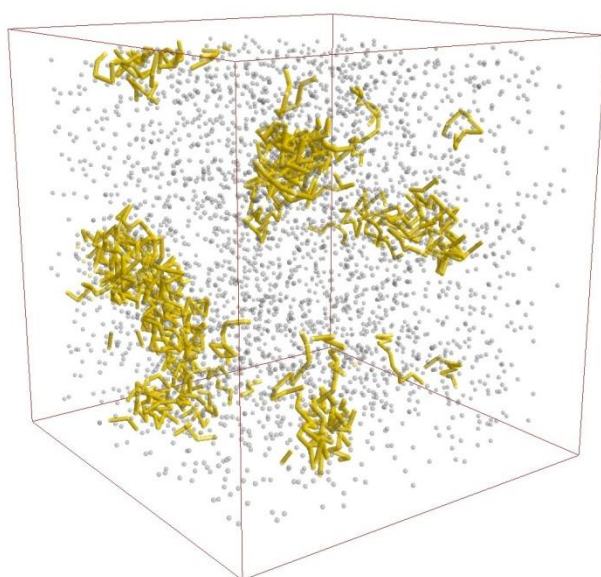

$$\epsilon_{KPh} = -0.5$$

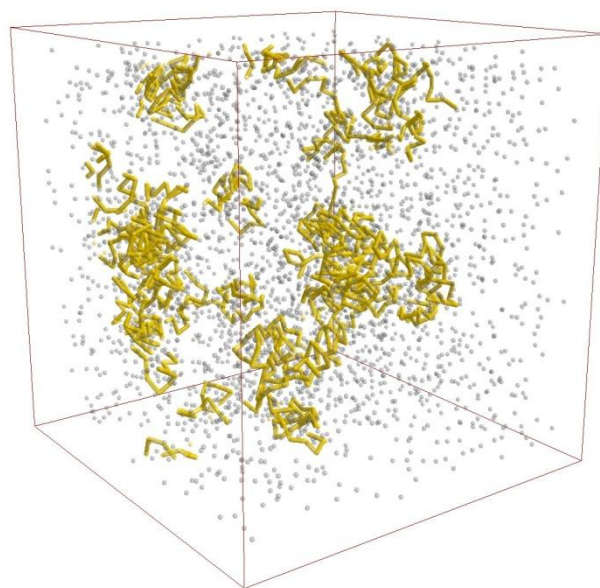

$$\epsilon_{KPh} = -0.6$$

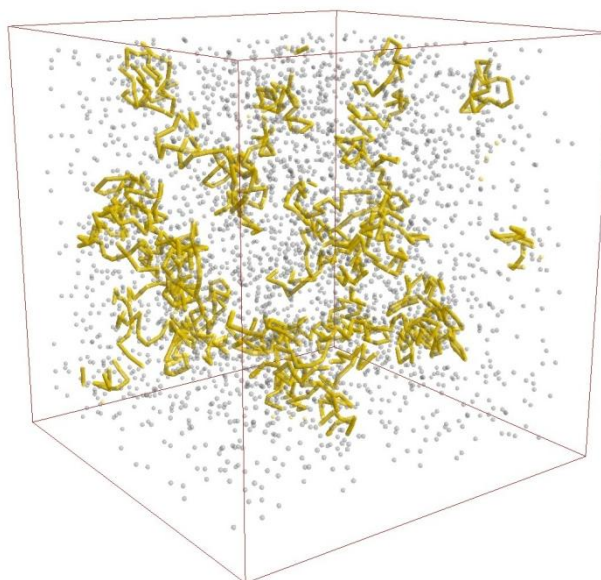

$$\epsilon_{KPh} = -0.7$$

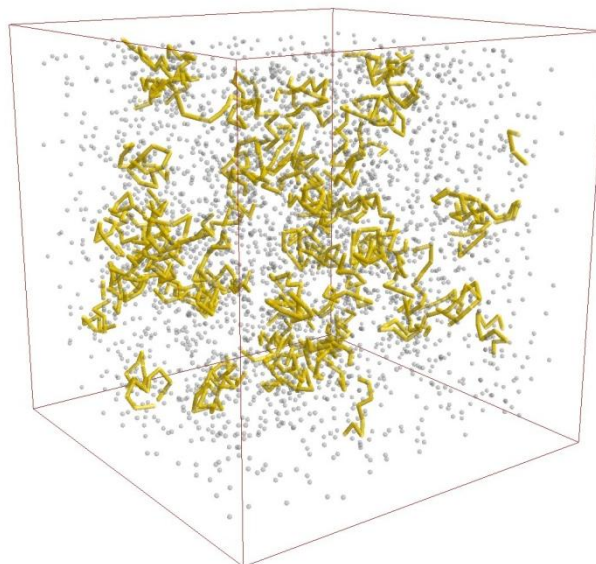

$$\epsilon_{KPh} = -0.8$$

**Figure S2 continued.** Snapshots of simulations of a  $64^3$  lattice size and at the end of time step  $t = 10^6$  MCS. The lysine ( $C_K$ ) and phosphate ( $C_{Ph}$ ) concentrations were 0.03 and 0.1, respectively. The lysine-phosphate interaction strength ( $\epsilon_{KPh}$ ) is shown below each snapshot.

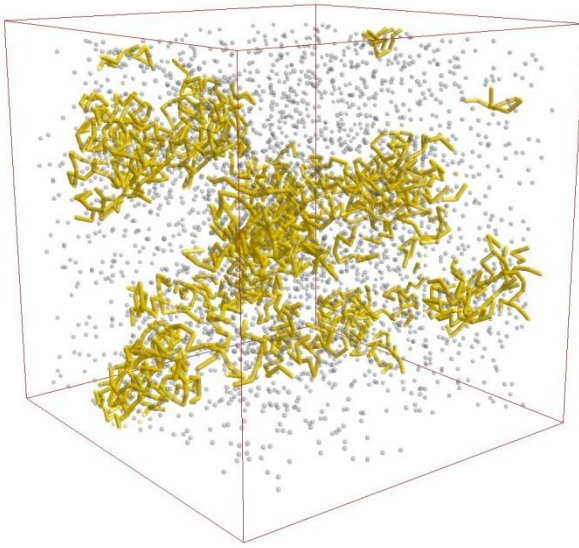

$$\epsilon_{KPh} = -0.5$$

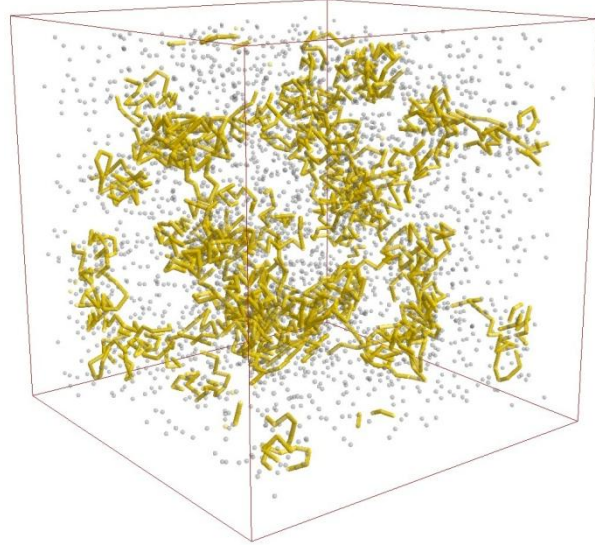

$$\epsilon_{KPh} = -0.6$$

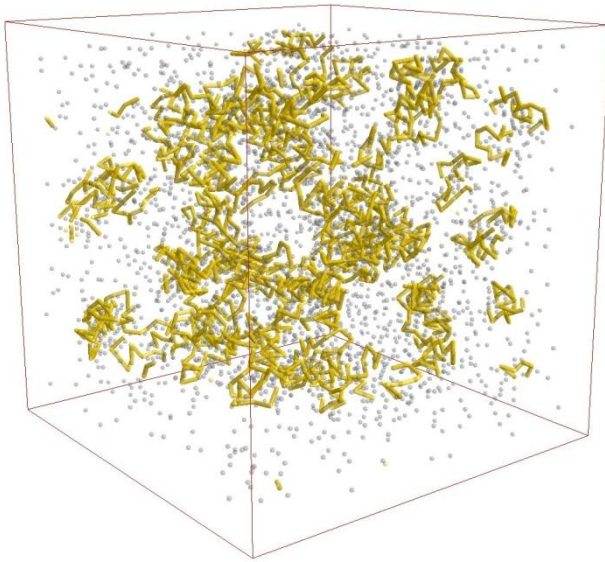

$$\epsilon_{KPh} = -0.7$$

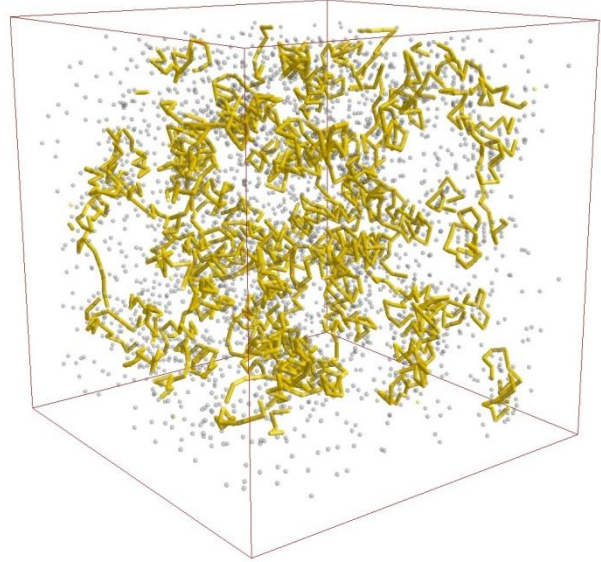

$$\epsilon_{KPh} = -0.8$$

**Figure S2 continued.** Snapshots of simulations of a  $64^3$  lattice size and at the end of time step  $t = 10^6$  MCS. The lysine ( $C_K$ ) and phosphate ( $C_{Ph}$ ) concentrations were 0.05 and 0.1, respectively. The lysine-phosphate interaction strength ( $\epsilon_{KPh}$ ) is shown below each snapshot.

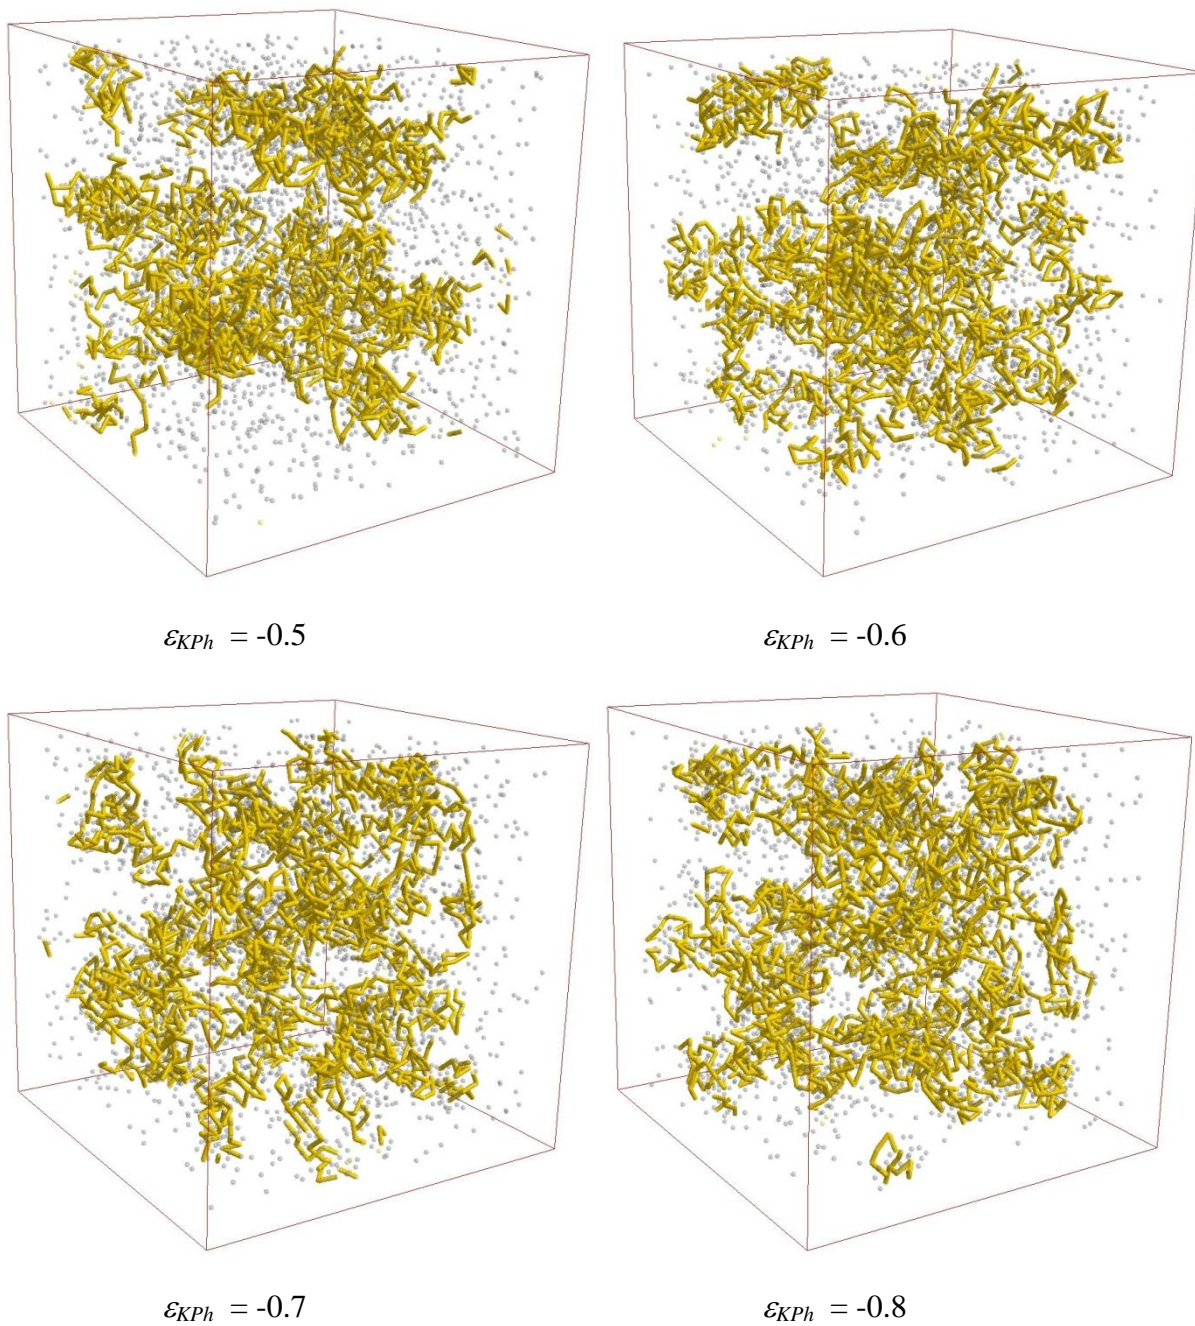

**Figure S2 continued.** Snapshots of simulations of a  $64^3$  lattice size and at the end of time step  $t = 10^6$  MCS. The lysine ( $C_K$ ) and phosphate ( $C_{Ph}$ ) concentrations were 0.07 and 0.1, respectively. The lysine-phosphate interaction strength ( $\epsilon_{KPh}$ ) is shown below each snapshot.
